# Supplementary material for: Synthetic Peptides as Structural Maquettes of Angiotensin‐I Converting Enzyme Catalytic Sites
Source: Hindawi journal article supplement (doi:10.1155/2010/820476), 2010-01-01
Supplement: f1 [file 820476.f1.pdf]

# Synthetic Peptides as Structural Maquettes of Angiotensin-I Converting Enzyme Catalytic Sites

Zinovia Spyramanti<sup>1a</sup>, Athanassios S. Galanis<sup>1a</sup>, George Pairas<sup>1</sup>, Georgios A. Spyroulias<sup>1\*</sup>,  
Evy Manessi-Zoupa<sup>2</sup> and Paul Cordopatis<sup>1\*</sup>

## SUPPORTING INFORMATION

**Table S1:**  $\phi$  and  $\psi$  dihedral angles of the  $\text{Zn}^{2+}$ -ACE<sub>C</sub>(37) peptide at 298K (H<sub>2</sub>O/TFE-*d*2 34%/66% v/v. pH=4.9).

**Table S2:**  $\phi$  and  $\psi$  dihedral angles of the  $\text{Zn}^{2+}$ -ACE<sub>N</sub>(37) peptide at 298K (H<sub>2</sub>O/TFE-*d*2 34%/66% v/v. pH=4.9).

**Figure S1:** Fingerprint regions of 600- MHz NOESY of ACE<sub>N</sub>(37) peptide recorded at T= 298 K. Characteristic long-range NOE connectivities between Tyr 368 with His 388, as well as with Phe 387 present only in the ACEN<sub>37</sub> peptide.

**Figure S2: Left:** Superimposition of  $\text{Zn}^{2+}$ -ACE<sub>C</sub>(37) DYANA 20 best models calculated with NMR data in blue and the crystal structure of ACE<sub>C</sub> in complex with lisinopril in yellow (pdb code:**1O86**). The calculated RMSD value is 0.775 for the backbone atoms. **Right:** Ribbon representation of the crystal structure of ACE<sub>C</sub> in complex with lisinopril and the mean NMR calculated structure of  $\text{Zn}^{2+}$ -ACE<sub>C</sub>(37). The calculated RMSD value is 3.595 for the backbone atoms.

**Figure S3: Left:** Superimposition of  $\text{Zn}^{2+}$ -ACE<sub>N</sub>(37) DYANA 20 best models calculated with NMR data in blue and the crystal structure of ACE<sub>C</sub> in complex with lisinopril in yellow (pdb code:**2C6N**). The calculated RMSD value is 1.42 for the backbone atoms. **Right:** Ribbon representation of the crystal structure of ACE<sub>N</sub> in complex with lisinopril and the mean NMR calculated structure of  $\text{Zn}^{2+}$ -ACE<sub>N</sub>(37). The calculated RMSD value is 3.802 for the backbone atoms.

**Table S1:**  $\phi$  and  $\psi$  dihedral angles (in degrees) of the  $\text{Zn}^{2+}$ -ACE<sub>C</sub>(37) peptide at 298K (H<sub>2</sub>O/TFE-*d*2 34%/66% v/v. pH=4.9).

| Residue |     | $\phi$        | $\psi$       |
|---------|-----|---------------|--------------|
| 1       | His | ---           | -60.2+/-77.2 |
| 2       | His | -28.7+/-71.6  | 133.7+/-81.4 |
| 3       | Glu | -117.3+/-94.6 | -20.5+/-10.0 |
| 4       | Met | -123.9+/-20.0 | 28.5+/-13.6  |
| 5       | Gly | -130.3+/-25.8 | -79.5+/-16.0 |
| 6       | His | -50.9+/-6.6   | -34.2+/-4.7  |
| 7       | Ile | -65.0+/-1.3   | -37.4+/-2.6  |
| 8       | Gln | -50.1+/-2.6   | -40.6+/-1.8  |
| 9       | Tyr | -69.7+/-2.3   | -45.9+/-1.0  |
| 10      | Phe | -62.8+/-1.0   | -30.3+/-2.1  |
| 11      | Met | -84.3+/-2.9   | -26.3+/-2.2  |
| 12      | Gln | -68.8+/-2.2   | -30.0+/-1.4  |
| 13      | Tyr | -50.6+/-1.1   | -36.2+/-3.0  |
| 14      | Lys | -74.6+/-1.0   | -25.8+/-0.8  |
| 15      | Asp | -87.2+/-2.3   | 54.5+/-1.4   |
| 16      | Leu | -64.6+/-1.1   | -42.8+/-0.3  |
| 17      | Pro | ---           | -1.8+/-1.2   |
| 18      | Val | -126.4+/-1.4  | 1.4+/-0.7    |
| 19      | Ala | -60.1+/-1.4   | -15.5+/-0.9  |
| 20      | Leu | -85.6+/-0.9   | 5.8+/-1.7    |
| 21      | Arg | -135.4+/-2.7  | -43.5+/-0.4  |
| 22      | Glu | -83.5+/-5.5   | -41.3+/-2.2  |
| 23      | Gly | -79.3+/-1.7   | -10.3+/-5.3  |
| 24      | Ala | -102.0+/-10.2 | 14.8+/-4.0   |
| 25      | Asn | -122.2+/-5.8  | 75.1+/-7.8   |
| 26      | Pro | ---           | -10.6+/-2.7  |
| 27      | Gly | -112.9+/-9.2  | 20.0+/-3.9   |
| 28      | Phe | -138.0+/-2.8  | -44.8+/-3.3  |
| 29      | His | -65.9+/-4.4   | -23.1+/-1.8  |
| 30      | Glu | -112.8+/-1.3  | -15.9+/-1.7  |
| 31      | Ala | -77.0+/-3.3   | -54.7+/-1.3  |
| 32      | Ile | -59.6+/-1.1   | -18.2+/-1.4  |
| 33      | Gly | -104.3+/-1.8  | -17.3+/-1.2  |
| 34      | Asp | -86.4+/-3.9   | -31.9+/-3.3  |
| 35      | Val | -63.3+/-3.9   | -49.4+/-1.9  |
| 36      | Leu | -64.6+/-8.7   | -11.0+/-6.4  |
| 37      | Ala | -149.3+/-14.5 | -60.3+/-53.3 |

**Table S2:**  $\phi$  and  $\psi$  dihedral angles (in degrees) of the the  $\text{Zn}^{2+}$ -ACE<sub>N</sub>(37) peptide at 298K (H<sub>2</sub>O/TFE-*d*2 34%/66% v/v. pH=4.9).

| Residue |     | $\phi$        | $\psi$       |
|---------|-----|---------------|--------------|
| 1       | His | ---           | 80.1+/-79.0  |
| 2       | His | -116.1+/-80.7 | 98.4+/-82.1  |
| 3       | Glu | -75.2+/-77.2  | 35.5+/-17.3  |
| 4       | Met | -59.3+/-81.1  | 25.7+/-61.3  |
| 5       | Gly | 128.3+/-38.9  | 7.0+/-31.6   |
| 6       | His | -89.1+/-19.8  | -43.9+/-12.3 |
| 7       | Ile | -61.4+/-5.6   | -45.2+/-7.6  |
| 8       | Gln | -63.2+/-6.1   | -28.0+/-4.0  |
| 9       | Tyr | -73.0+/-3.9   | -17.1+/-4.3  |
| 10      | Tyr | -112.1+/-3.0  | -42.4+/-4.5  |
| 11      | Leu | -52.9+/-6.1   | -45.2+/-1.6  |
| 12      | Gln | -78.0+/-1.8   | -22.0+/-2.5  |
| 13      | Tyr | -84.0+/-4.5   | -1.0+/-4.3   |
| 14      | Lys | -41.7+/-8.6   | -39.6+/-9.2  |
| 15      | Asp | -165.3+/-10.2 | 86.1+/-30.4  |
| 16      | Leu | -107.2+/-15.4 | 160.5+/-1.0  |
| 17      | Pro | ---           | -6.2+/-2.2   |
| 18      | Val | 37.9+/-1.9    | 87.2+/-2.9   |
| 19      | Ser | -129.1+/-8.2  | -44.1+/-3.4  |
| 20      | Leu | -96.4+/-4.3   | 6.6+/-6.8    |
| 21      | Arg | -124.2+/-7.8  | -44.2+/-4.1  |
| 22      | Arg | -42.5+/-8.5   | -27.4+/-6.7  |
| 23      | Gly | -140.4+/-19.3 | -13.7+/-37.6 |
| 24      | Ala | -103.6+/-35.2 | -87.4+/-6.6  |
| 25      | Asn | 43.2+/-31.9   | 67.1+/-11.8  |
| 26      | Pro | ---           | -9.5+/-4.9   |
| 27      | Gly | 142.1+/-9.4   | 101.4+/-8.6  |
| 28      | Phe | -128.7+/-14.7 | -44.2+/-5.6  |
| 29      | His | -47.1+/-9.4   | -57.0+/-10.3 |
| 30      | Glu | -83.6+/-2.2   | -24.0+/-1.4  |
| 31      | Ala | -58.0+/-6.9   | -52.5+/-3.4  |
| 32      | Ile | -58.3+/-2.9   | -42.4+/-0.4  |
| 33      | Gly | -65.9+/-2.3   | -33.0+/-1.1  |
| 34      | Asp | -72.9+/-3.0   | -9.8+/-2.2   |
| 35      | Val | -96.8+/-4.6   | -26.9+/-4.1  |
| 36      | Leu | -104.1+/-25.4 | 6.3+/-53.4   |
| 37      | Ala | -126.7+/-59.8 | -93.9+/-77.1 |

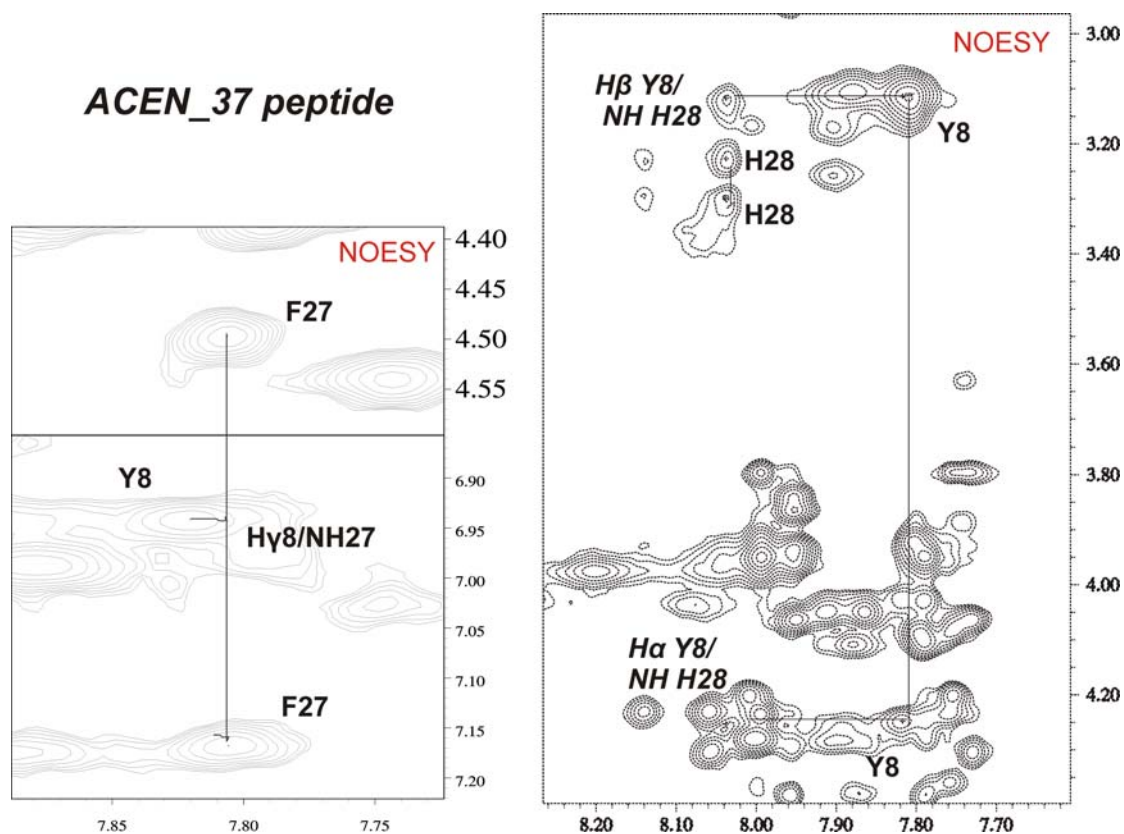

**Figure S1:** Fingerprint regions of 600- MHz NOESY of  $\text{Zn}^{2+}$ -ACE<sub>N</sub>(37) peptide recorded at T= 298 K. Characteristic long-range NOE connectivities between Tyr<sup>8</sup> with His<sup>28</sup>, as well as with Phe<sup>27</sup> present only in the  $\text{Zn}^{2+}$ -ACE<sub>N</sub>(37) peptide.

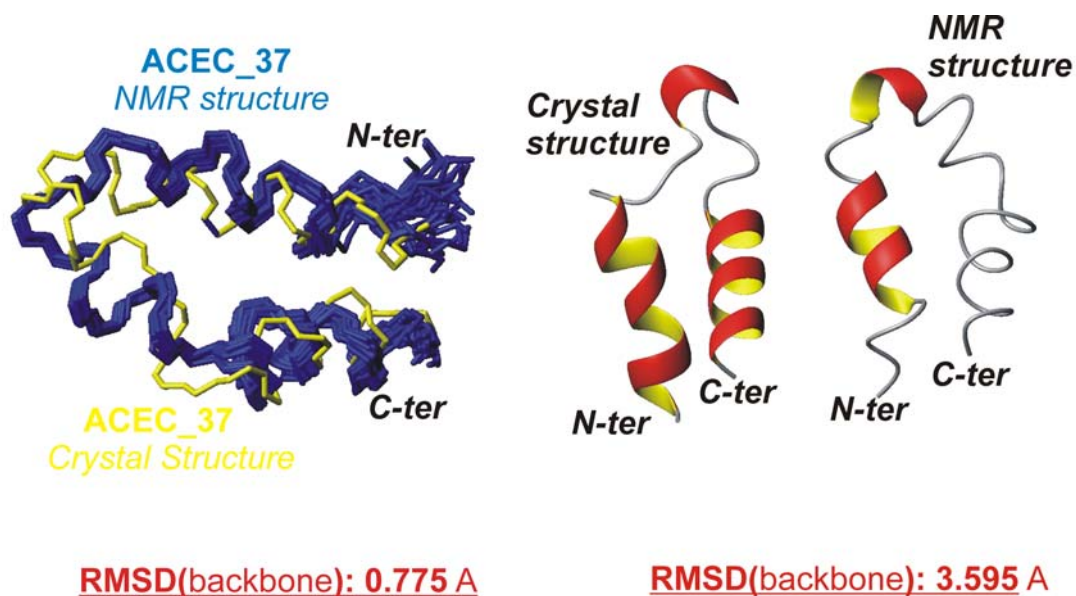

**Figure S2. Left:** Superimposition of Zn<sup>2+</sup>-ACE<sub>C</sub>(37) DYANA 20 best models calculated with NMR data in blue and the crystal structure of ACE<sub>C</sub> in complex with lisinopril in yellow (pdb code:1086). The calculated RMSD value is 0.775 Å for the backbone atoms. **Right:** Ribbon representation of the crystal structure of ACE<sub>C</sub> in complex with lisinopril and the mean NMR calculated structure of Zn<sup>2+</sup>-ACE<sub>C</sub>(37). The calculated RMSD value is 3.595 Å for the backbone atoms.

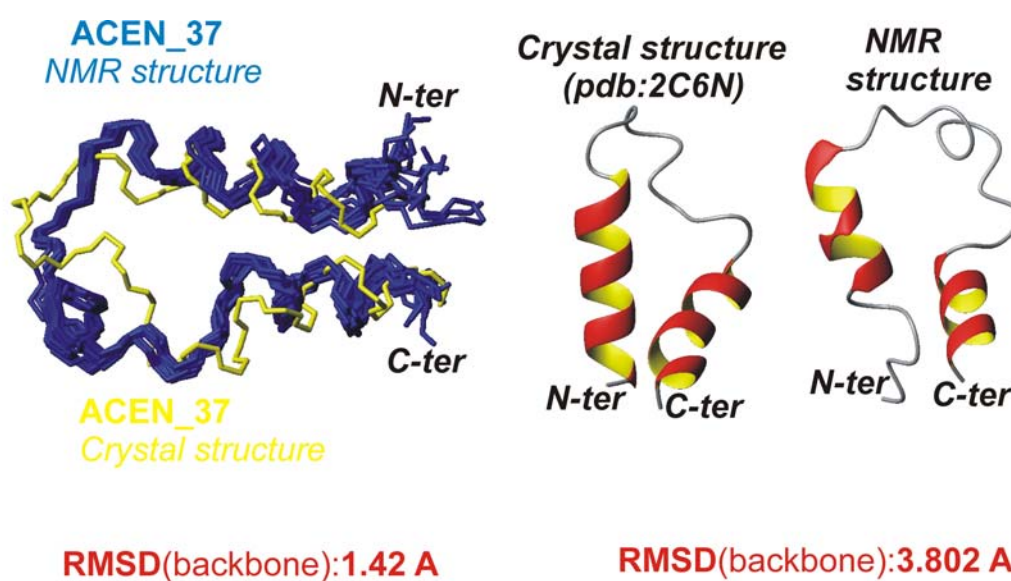

**Figure S3: Left:** Superimposition of  $\text{Zn}^{2+}$ -ACE<sub>N</sub>(37) DYANA 20 best models calculated with NMR data in blue and the crystal structure of ACE<sub>C</sub> in complex with lisinopril in yellow (pdb code:2C6N). The calculated RMSD value is 1.42 Å for the backbone atoms. **Right:** Ribbon representation of the crystal structure of ACE<sub>N</sub> in complex with lisinopril and the mean NMR calculated structure of  $\text{Zn}^{2+}$ -ACE<sub>N</sub>(37). The calculated RMSD value is 3.802 Å for the backbone atoms.
